# Supplementary material for: Transcriptome analysis of Pinus halepensis under drought stress and during recovery
Source: PubMed Central journal article supplement — Tree Physiol. 2017 Nov 21;38(3):423–41. doi: 10.1093/treephys/tpx137 (PMC5982726; doi:10.1093/treephys/tpx137), 2017-11-21
Supplement: supplementaryfigure1.pdf [file supplementaryfigure1.pdf]

# Supplementary Figure 1

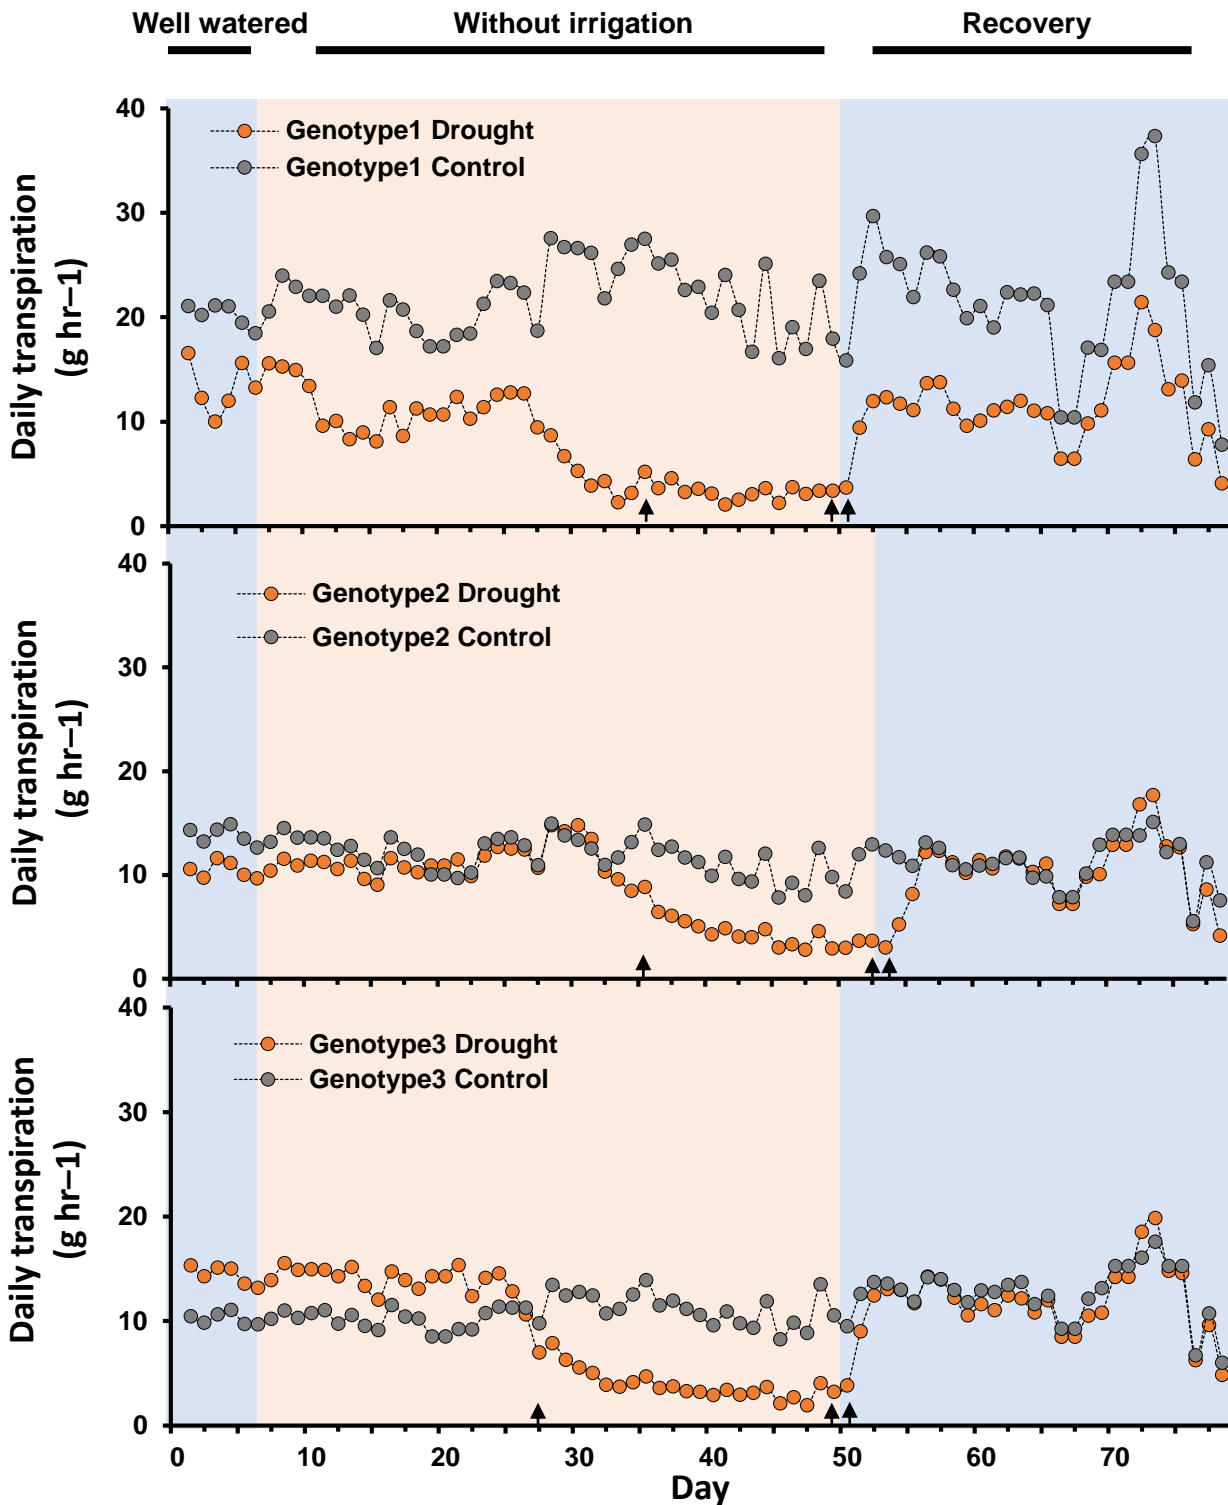

**Figure S1:** Whole plant daily transpiration rate of three *P. halepensis* genotypes in response to drought and during recovery. Midday transpiration rate (E) was determined for control (grey) and drought-treated trees (orange) in accordance with the average transpiration between the hours 11AM and 13PM. Each genotype represents one treatment plant and one control plant. Samples for quantitative RT-PCR analysis were taken at partial stomatal closure (left arrow), minimum transpiration (middle arrow) and post-irrigation (right arrow) physiological stages.
